# Supplementary material for: Multi-step polymer degradation kinetics using activation energy-dependent cataluminescence
Source: Royal Society of Chemistry journal article supplement (doi:10.1039/d2gc00039c), 2022-01-01
Supplement: d2gc00039c1.pdf [file d2gc00039c1.pdf]

Supplementary Information for:

**Multi-step polymer degradation kinetics using activation energy-  
dependent cataluminescence**

Zenghe Li,<sup>a</sup> Jing Feng,<sup>a</sup> Rui Tian,<sup>\*a</sup> and Chao Lu<sup>\*a,b</sup>

*<sup>a</sup>State Key Laboratory of Chemical Resource Engineering, Beijing University of  
Chemical Technology, Beijing, 100029, China*

*<sup>b</sup>Green Catalysis Center, and College of Chemistry, Zhengzhou University,  
Zhengzhou, 450001, China*

\*E-mail: [tianrui@mail.buct.edu.cn](mailto:tianrui@mail.buct.edu.cn); [luchao@mail.buct.edu.cn](mailto:luchao@mail.buct.edu.cn)

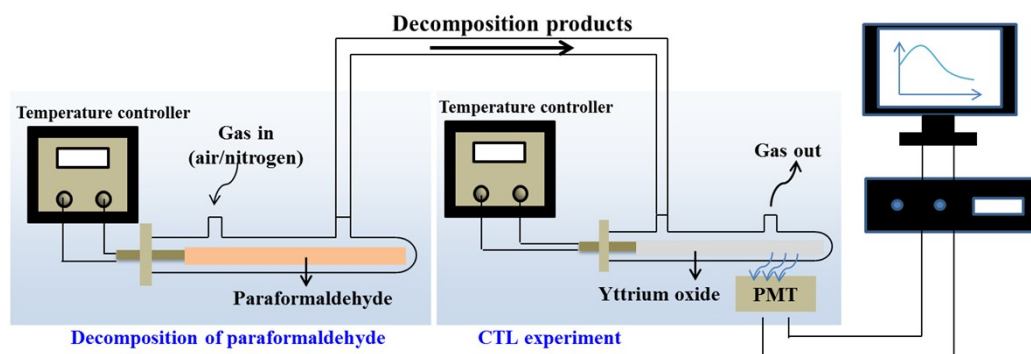

**Fig. S1.** Schematic representation of the CTL system.

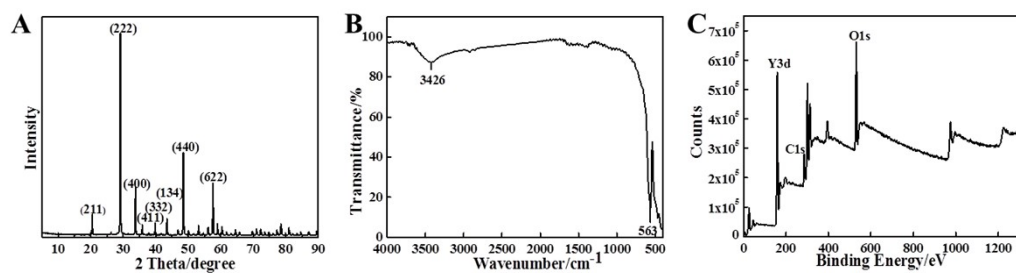

**Fig. S2.** (A) XRD pattern, (B) FT-IR transmittance spectrum and (C) XPS spectrum of yttrium oxide particles.

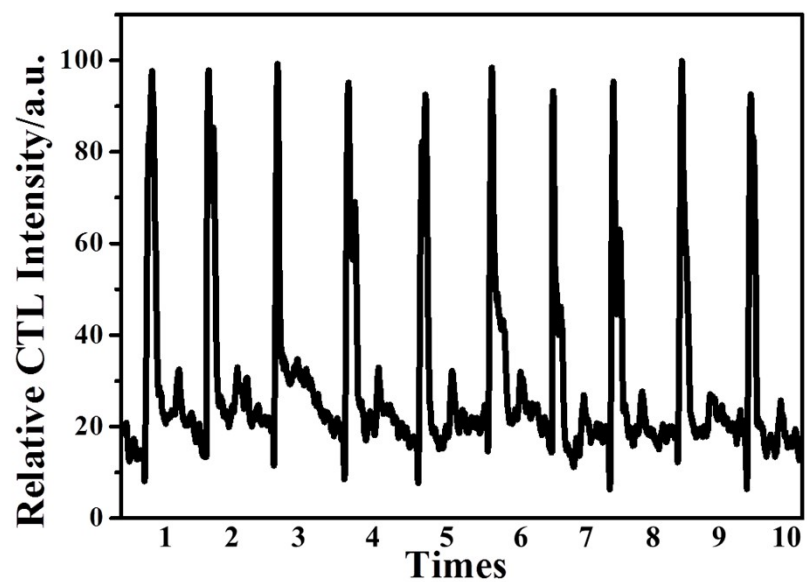

**Fig. S3.** Reproducibility of the CTL intensity of formaldehyde (40 mM) under 165 °C catalyzed by yttrium oxide.

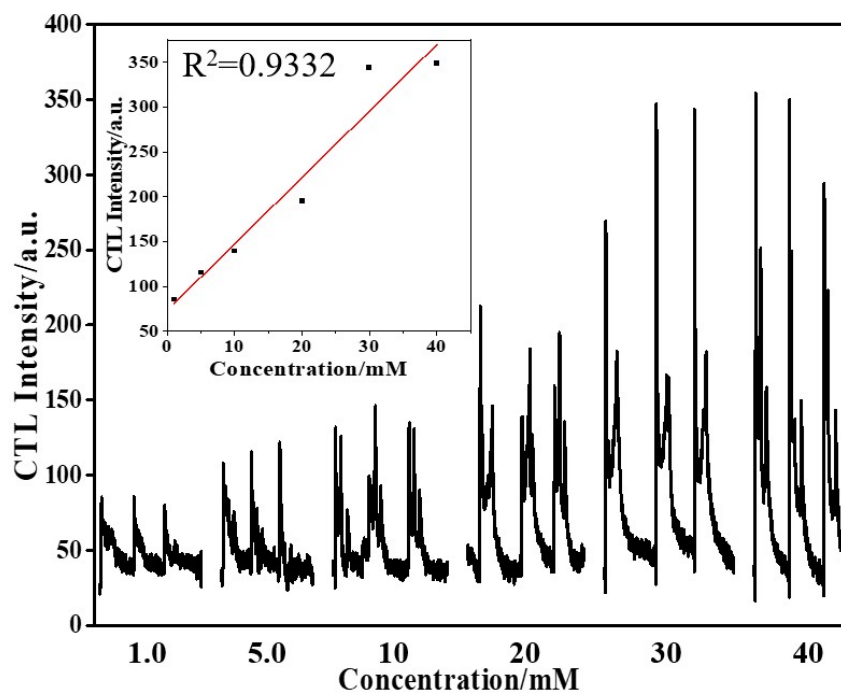

**Fig. S4.** Relationship between the concentrations of formaldehyde and the CTL intensity catalyzed by yttrium oxide, and the inset showed the linearity in the range of 1.0 to 40.0 mM.

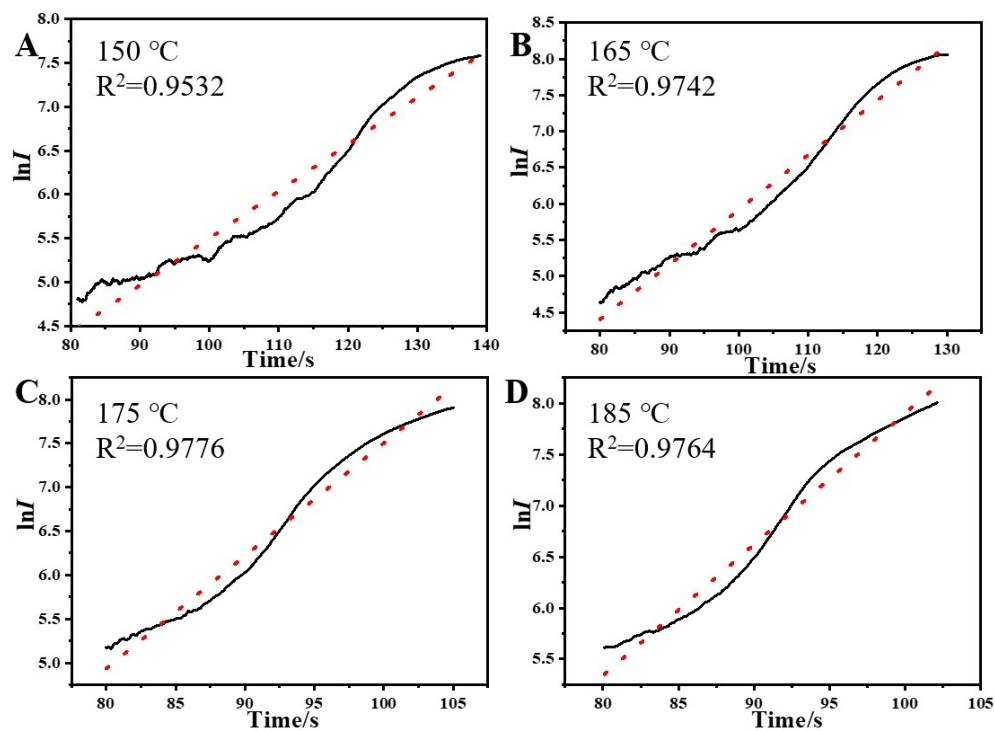

**Fig. S5.** Linear fitting curves of the CTL intensity ( $I$ ) and time ( $t$ ) for the first peak in the thermal degradation of POM in air under different temperatures: (A) 150 °C, (B) 165 °C, (C) 175 °C and (D) 185 °C.

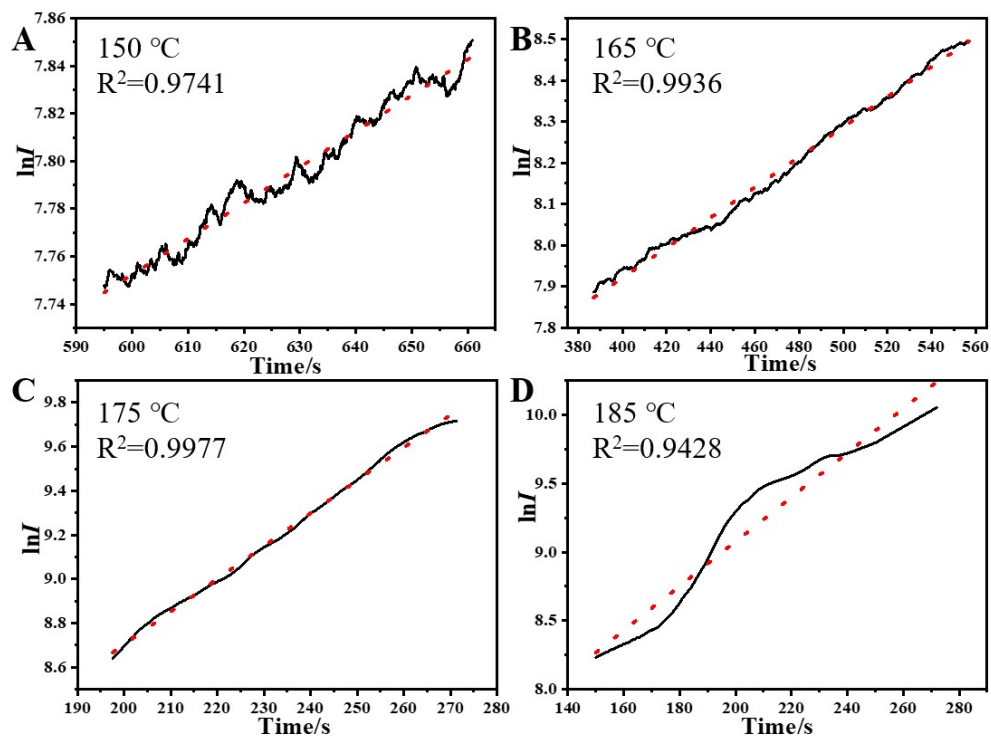

**Fig. S6.** Linear fitting curves of the CTL intensity ( $I$ ) and time ( $t$ ) for the second peak in the thermal degradation of POM in air under different temperatures: (A) 150 °C, (B) 165 °C, (C) 175 °C and (D) 185 °C.

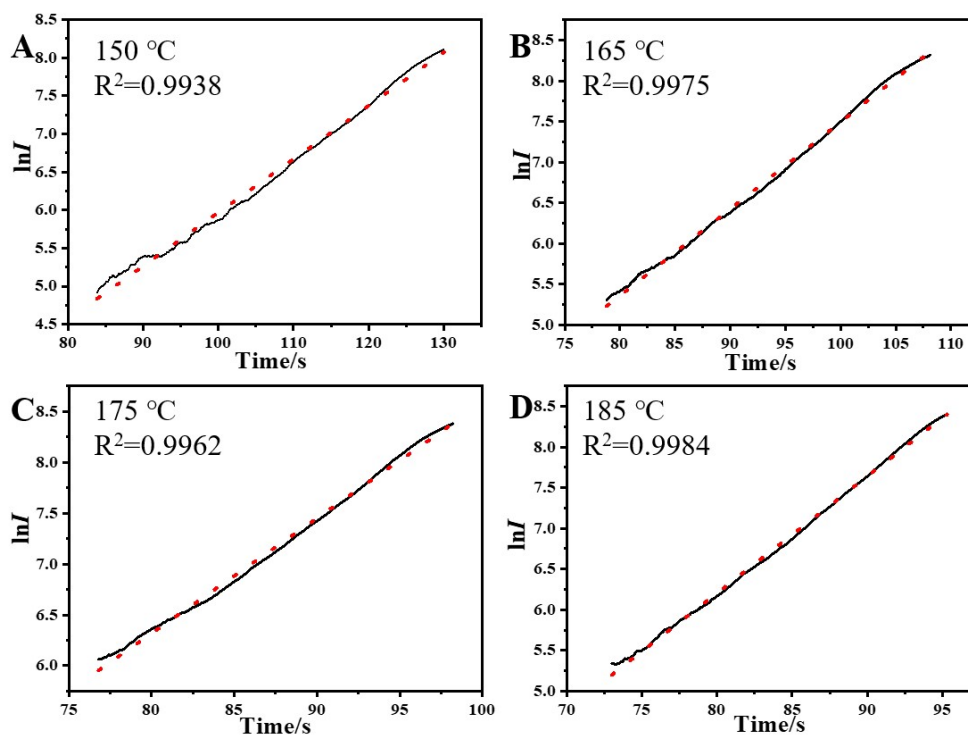

**Fig. S7.** Linear fitting curves of the CTL intensity ( $I$ ) and time ( $t$ ) for the first peak in the thermal degradation of POM in nitrogen under different temperatures: (A) 150 °C, (B) 165 °C, (C) 175 °C and (D) 185 °C.



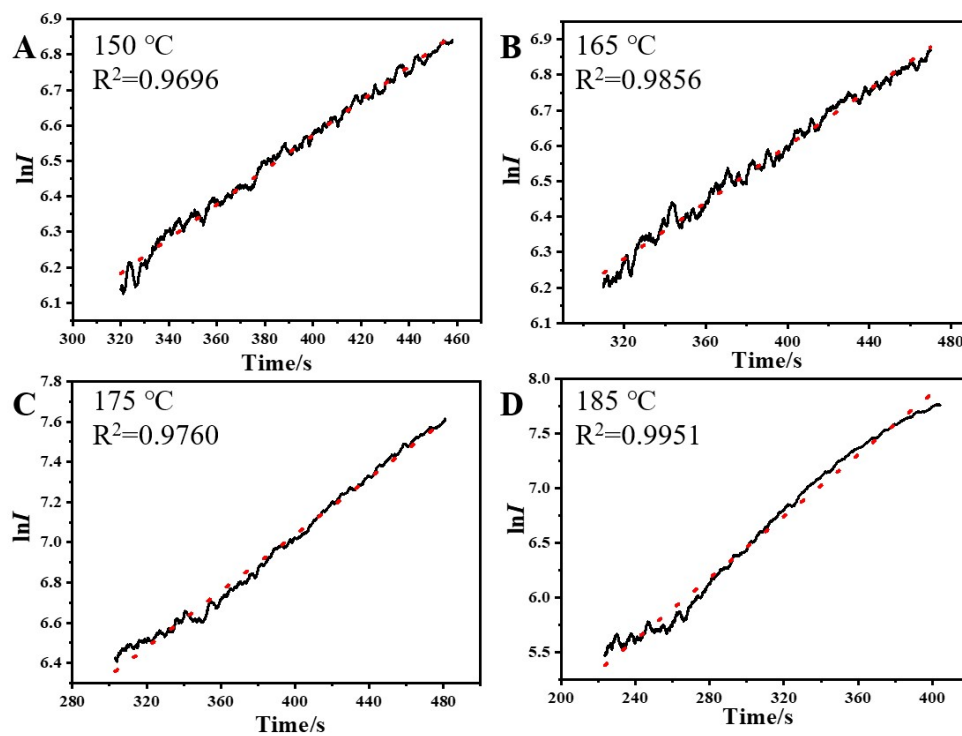

**Fig. S8.** Linear fitting curves of the CTL intensity ( $I$ ) and time ( $t$ ) for the second peak in the thermal degradation of POM in nitrogen under different temperatures: (A) 150 °C, (B) 165 °C, (C) 175 °C and (D) 185 °C.

**Table S1.** The relationship between the heating voltages and corresponding temperatures.

| <b>Heating voltage/V</b> | <b>Temperature/°C</b> |
|--------------------------|-----------------------|
| 95                       | 150                   |
| 100                      | 165                   |
| 110                      | 175                   |
| 115                      | 185                   |

**Table S2.** The  $k$  values of the two step reactions under different temperatures in air.

| Temperature/°C | $k_1/s^{-1}$ | $k_2/s^{-1}$ |
|----------------|--------------|--------------|
| 150            | 0.0536       | 0.0015       |
| 165            | 0.0757       | 0.0037       |
| 175            | 0.1285       | 0.0149       |
| 185            | 0.1281       | 0.0162       |

**Table S3.** The  $k$  values of the two step reactions under different temperatures in nitrogen.

| Temperature/°C | $k_1/s^{-1}$ | $k_2/s^{-1}$ |
|----------------|--------------|--------------|
| 150            | 0.0702       | 0.0049       |
| 165            | 0.1067       | 0.0040       |
| 175            | 0.1133       | 0.0070       |
| 185            | 0.1435       | 0.0141       |
